# Supplementary material
Source: PubMed Central journal article supplement (PMC2962516)
Supplement: supp_M110.128355_jbc.M110.128355-1.pdf [file supp_M110.128355_jbc.M110.128355-1.pdf]

## Supplemental data

### Collagen I (Alpha-1)

CO1A1\_HUMAN GPAGAPGTPGPQGIAGQRGVVGLPGQR  
CO1A1\_RAT GPAGSPGTPGPQGIAGQRGVVGLPGQR  
CO1A1\_MOUSE GPAGSPGTPGPQGIAGQRGVVGLPGQR  
CO1A1\_BOVIN GPAGAPGTPGPQGIAGQRGVVGLPGQR  
CO1A1\_CHICK GPIGAPGTPGPQGIAGQRGVVGLPGQR  
CO1A1\_Canis GPAGAPGTPGPQGIAGQRGVVGLPGQR  
CO1A1\_CYNPY GPAGAPGTPGPQGIAGQRGVVGLPGQR

### Collagen I (Alpha-2)

CO1A2\_HUMAN GTAGPPGTPGPQGLLGAPGILGLPGSR  
CO1A2\_RAT GTTGPPGTAGPQGLLGAPGILGLPGSR  
CO1A2\_MOUSE GTAGAPGTAGPQGLLGAPGILGLPGSR  
CO1A2\_BOVIN GTAGPPGTPGPQGLLGAPGFLGLPGSR  
CO1A2\_CHICK GAAGPPGTPGPQGILGAPGILGLPGSR  
CO1A2\_CANFA GTAGPPGTPGPQGLLGAPGILGLPGSR  
CO1A2\_RANCA GPAGPPGAAGPSGVLGARGILGLPGTR  
CO1A2\_ONCMY GPPGAPGTAGPQGVLPSPGFVGLPGSR

### Collagen II (Alpha-1)

CO2A1\_HUMAN GPSGAEPPGPQGLAGQRGIVGLPGQR  
CO2A1\_RAT GPSGSDGPPGPQGLAGQRGIVGLPGQR  
CO2A1\_MOUSE GPSGLDGPPGPQGLAGQRGIVGLPGQR  
CO2A1\_XENTR GPSGPDGPPGPQGLSGQRGIVGLPGQR  
CO2A1\_XENLA GPSGPDGPPGPQGLSGQRGIVGLPGQR

### Collagen III (Alpha-1)

CO3A1\_HUMAN GAQGGPPGAPGPLGIAGITGARGLAGPP  
CO3A1\_RAT GAQGGPPGSPGPLGIAGLTGARGLAGPP  
CO3A1\_MOUSE GAQGGPPGSPGPLGIAGLTGARGLAGPP  
CO3A1\_BOVIN GPQGGPPGAPGPLGIAGLTGARGLAGPP

Figure S1. Alignment of the sequences at the collagenase cleavage sites in types I-III collagens across different species. Cleavage triplet is colored in red. Non-conserved residues are colored in blue.

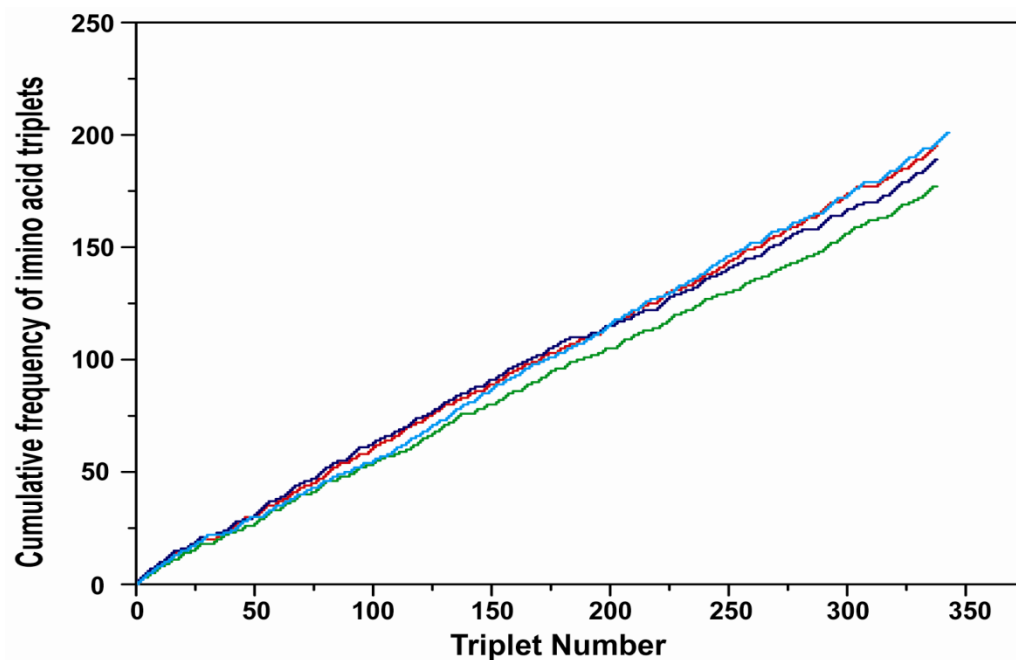

**Figure S2. Cumulative frequency of imino acid triplets in CO1A1(red), CO1A2(green), CO2A1(blue) and CO3A1(cyan). CO1A1, CO1A2, CO2A1 and CO3A1 have totally 195, 177, 189 and 201 imino acid triplets, respectively.**

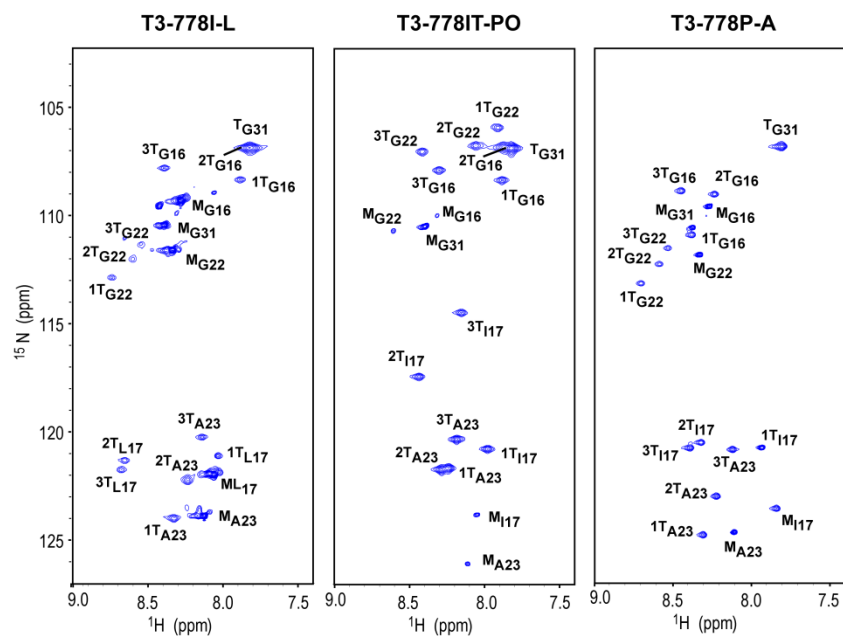

**Figure S3.  $^1\text{H}$ - $^{15}\text{N}$  HSQC spectra of peptides T3-778[I-L], T3-778[IT-PO] and T3-778[P-A].** All the spectra were obtained at pH 3.1 at 20 °C. The peaks corresponding to the monomer and trimer state are denoted with a superscript M or T. The superscripted number 1, 2 and 3 corresponds to the leading, middle and lagging chains, respectively.

**Table S1. Protection factors of model peptides.**

| Residues | T3-778     | T3-778[I-L] | T3-778[IT-PO] | T3-778[P-A] | Residues | T3-785       |
|----------|------------|-------------|---------------|-------------|----------|--------------|
| 1G16     | 1598+/-824 | 2254+/-345  | 2709+/-750    | 584+/-70.1  | 1G15     | 525.2+/-39.6 |
| 3G16     | 753+/-144  | 563+/-36.5  | 857+/-110     | 647+/-88.7  | 3G15     | 541+/-56.2   |
| 1H17     | 1.7+/-0.2  | 1.2+/-0.5   | 1.1+/-0.2     | 3.2+/-0.2   | 1L16     | 98.3+/-5.9   |
| 2H17     | 10.9+/-0.9 | 5+/-0.5     | 10.5+/-1.2    | 6.1+/-0.4   | 2L16     | 213.4+/-13.9 |
| 3H17     | 6.2+/-0.6  | 3.2+/-0.3   | 1.5+/-0.3     | 3.8+/-0.2   | 3L16     | 236.5+/-15.9 |
| 1G22     | 658+/-161  | 1170+/-137  | 388+/-27.9    | 2072+/-1631 | 1A17     | 27+/-2       |
| 2G22     | N/A        | 4079+/-2962 | 847+/-109     | 856+/-425   | 2A17     | 14+/-1.4     |
| 3G22     | 622+/-293  | N/A         | 1026+/-204    | 636+/-236   | 3A17     | 14.7+/-1.7   |
| 1A23     | 9.5+/-1    | 12.8+/-1.4  | 17.9+/-2.5*   | 8.9+/-0.7   | 1G18     | 649+/-65.1   |
| 2A23     | 10+/-1.3   | 7.8+/-0.7   | 17.9+/-2.5*   | 11.8+/-1.0  | 2G18     | 868+/-100.3  |
| 3A23     | 18.2+/-2.7 | 9+/-0.9     | 14.1+/-2.1    | 9.7+/-0.6   | 3G18     | 612+/-41.8   |
| G31      | 651+/-57.7 | 1068+/-67   | 1185+/-80     | 303+/-17.7  | G24      | 325+/-16.2   |

\* Hydrogen exchange experiments were performed at 10°C and pD 2.3-2.8 for the peptide set. Trimer resonances for 1A23 and 2A23 are overlapped.
